# Supplementary material
Source: publisher site journal article supplement (https://www.dovepress.com/article/547105)
Supplement: Supplementary file 1 [file 547105%20Supplementary%20Material.docx]

**
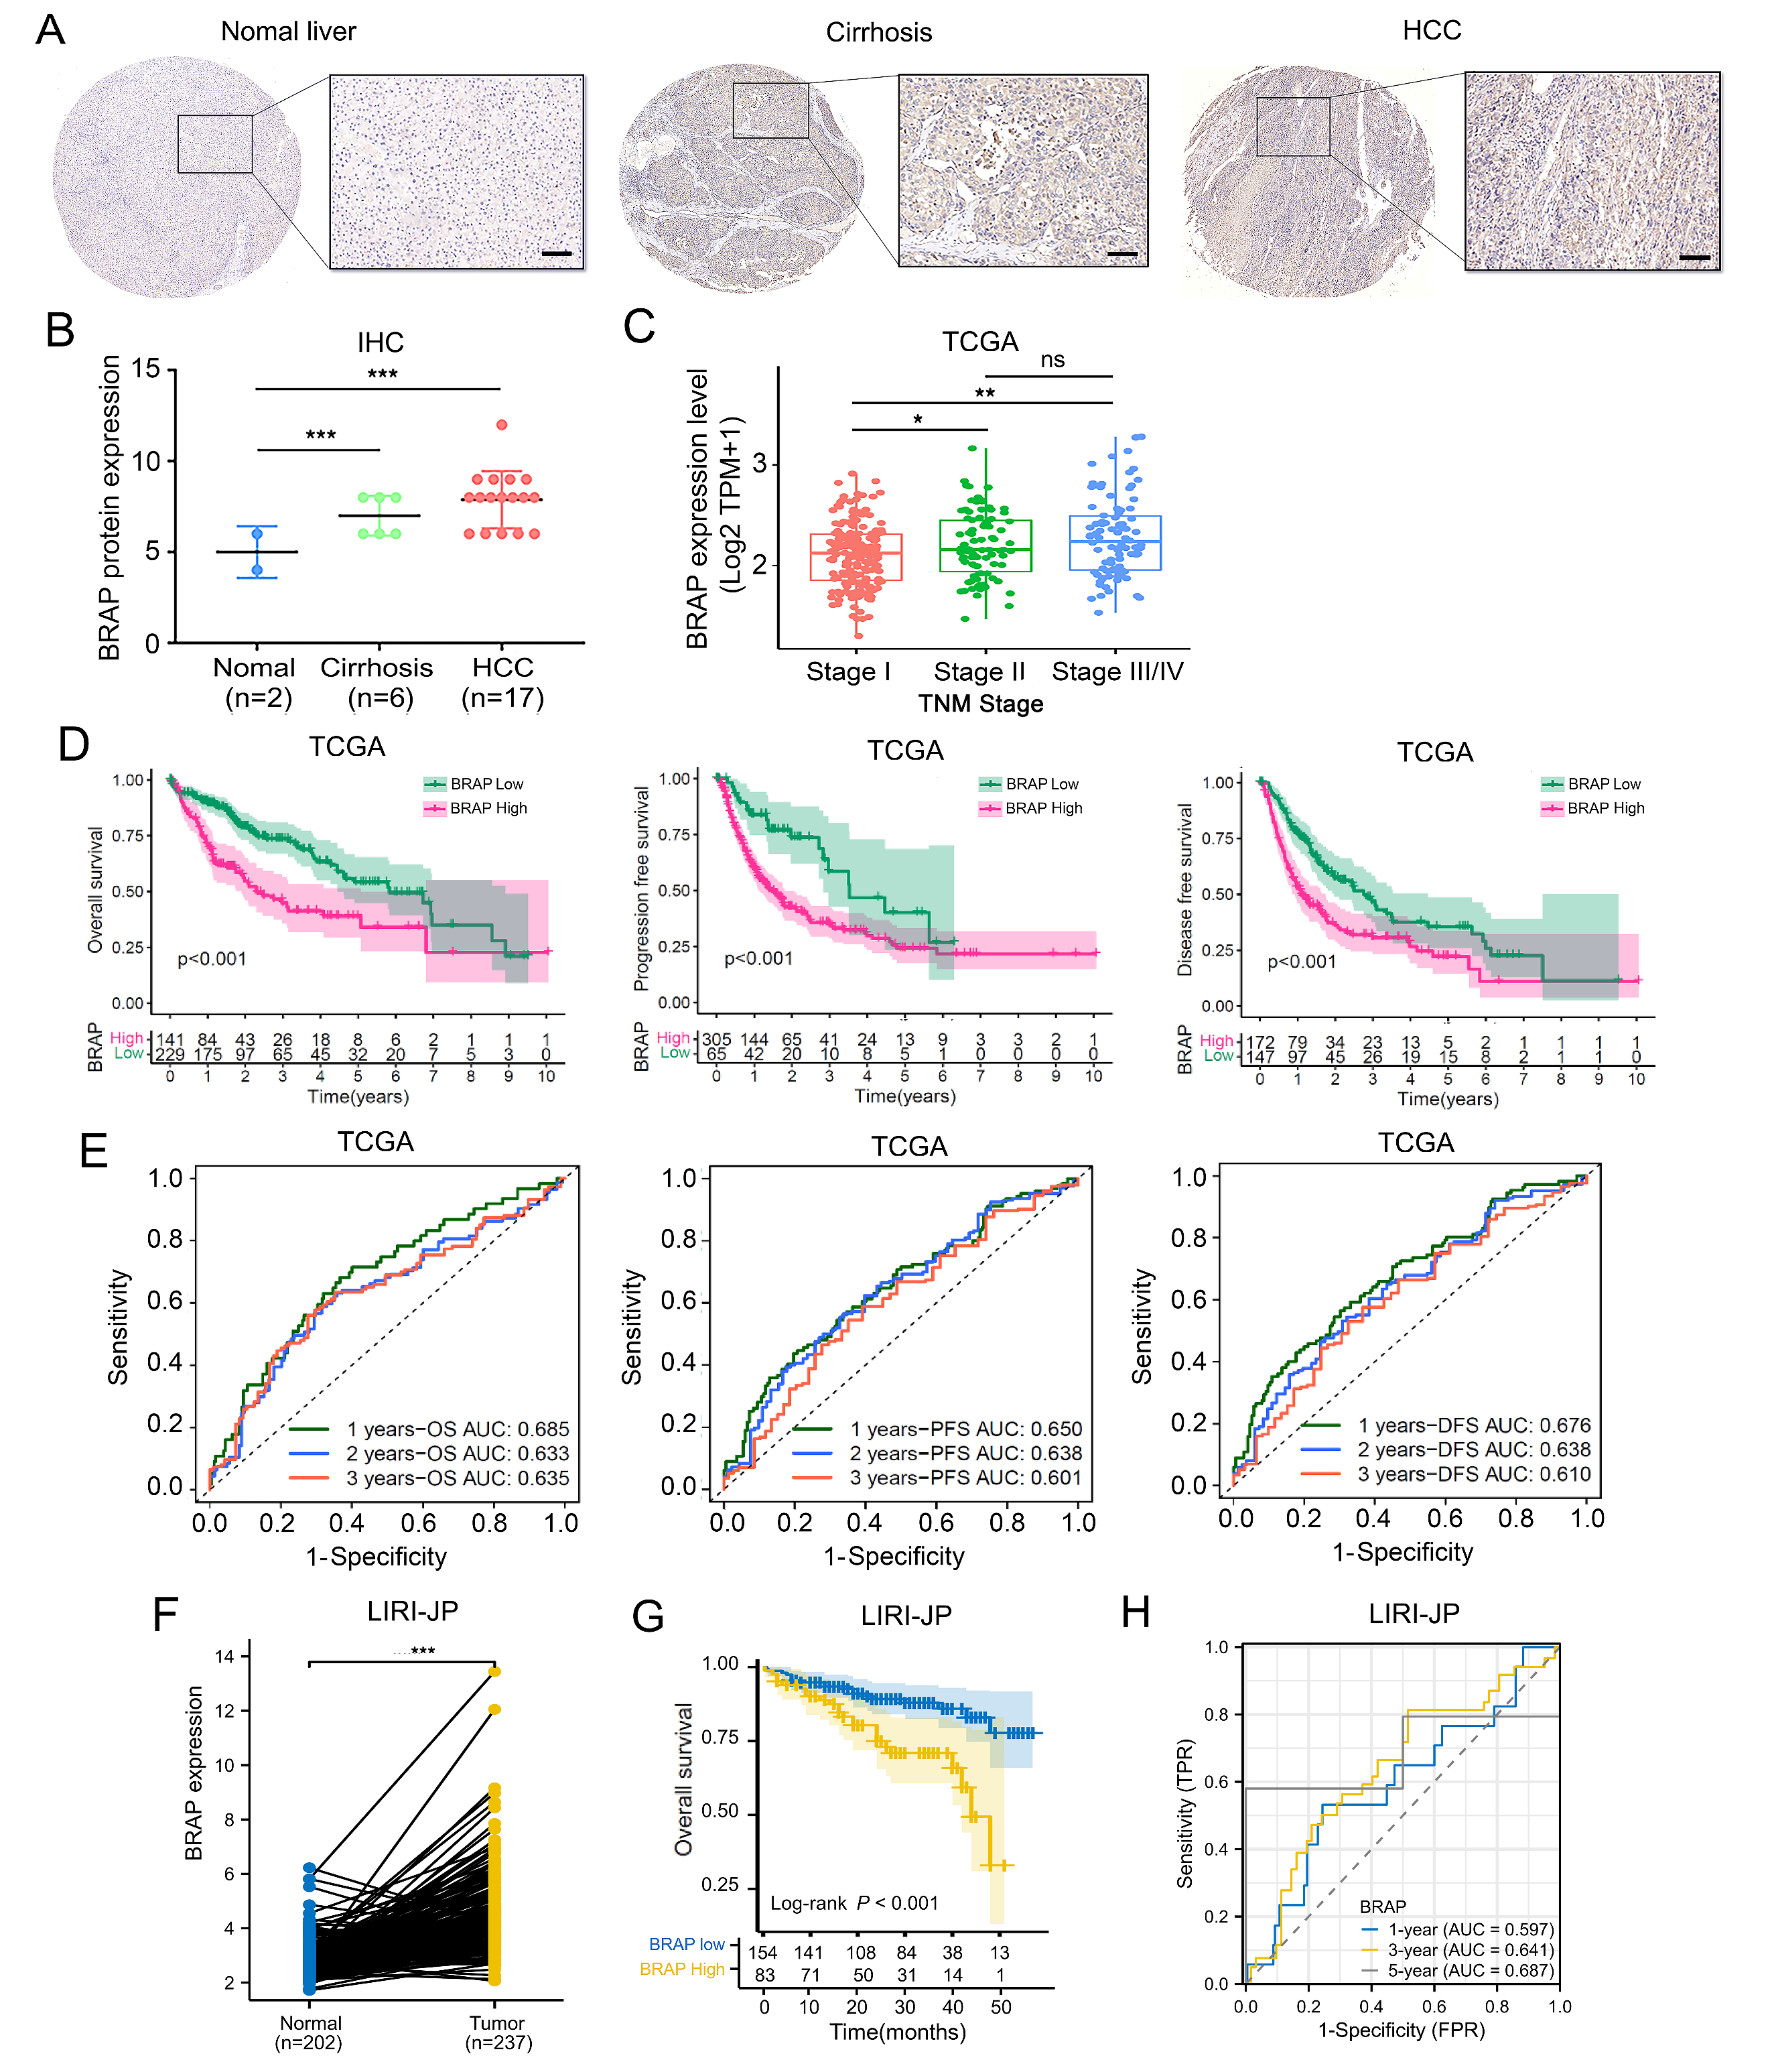
**

**Figure S1: Correlation between BRAP expression and HCC prognosis analyzed using public datasets.** (A-B) Representative IHC images and quantitative analysis of BRAP expression in normal liver tissues, cirrhotic tissues, and HCC tissues (scale bar=50 μm). (C) BRAP expression levels across different TNM stages of HCC were compared using TCGA data. (D) Kaplan-Meier curves were generated to compare OS, PFS, and DFS between high-and low-BRAP expression groups in the TCGA cohort. (E) ROC curves were used to assess the predictive value of BRAP expression for 1-, 2-, and 3-year OS, PFS, and DFS in the TCGA database. (F) BRAP expression was compared between normal liver tissues and HCC tissues in the LIRI-JP cohort. (G) Kaplan-Meier curves were used to compare OS between high-and low-BRAP expression groups in the LIRI-JP cohort. (H) ROC curves were used to assess the predictive value of BRAP expression for 1-, 3-, and 5-year OS in the LIRI-JP database. ns: *P* > 0.05; **P* ≤ 0.05; ***P* < 0.01; ****P* < 0.001.

**
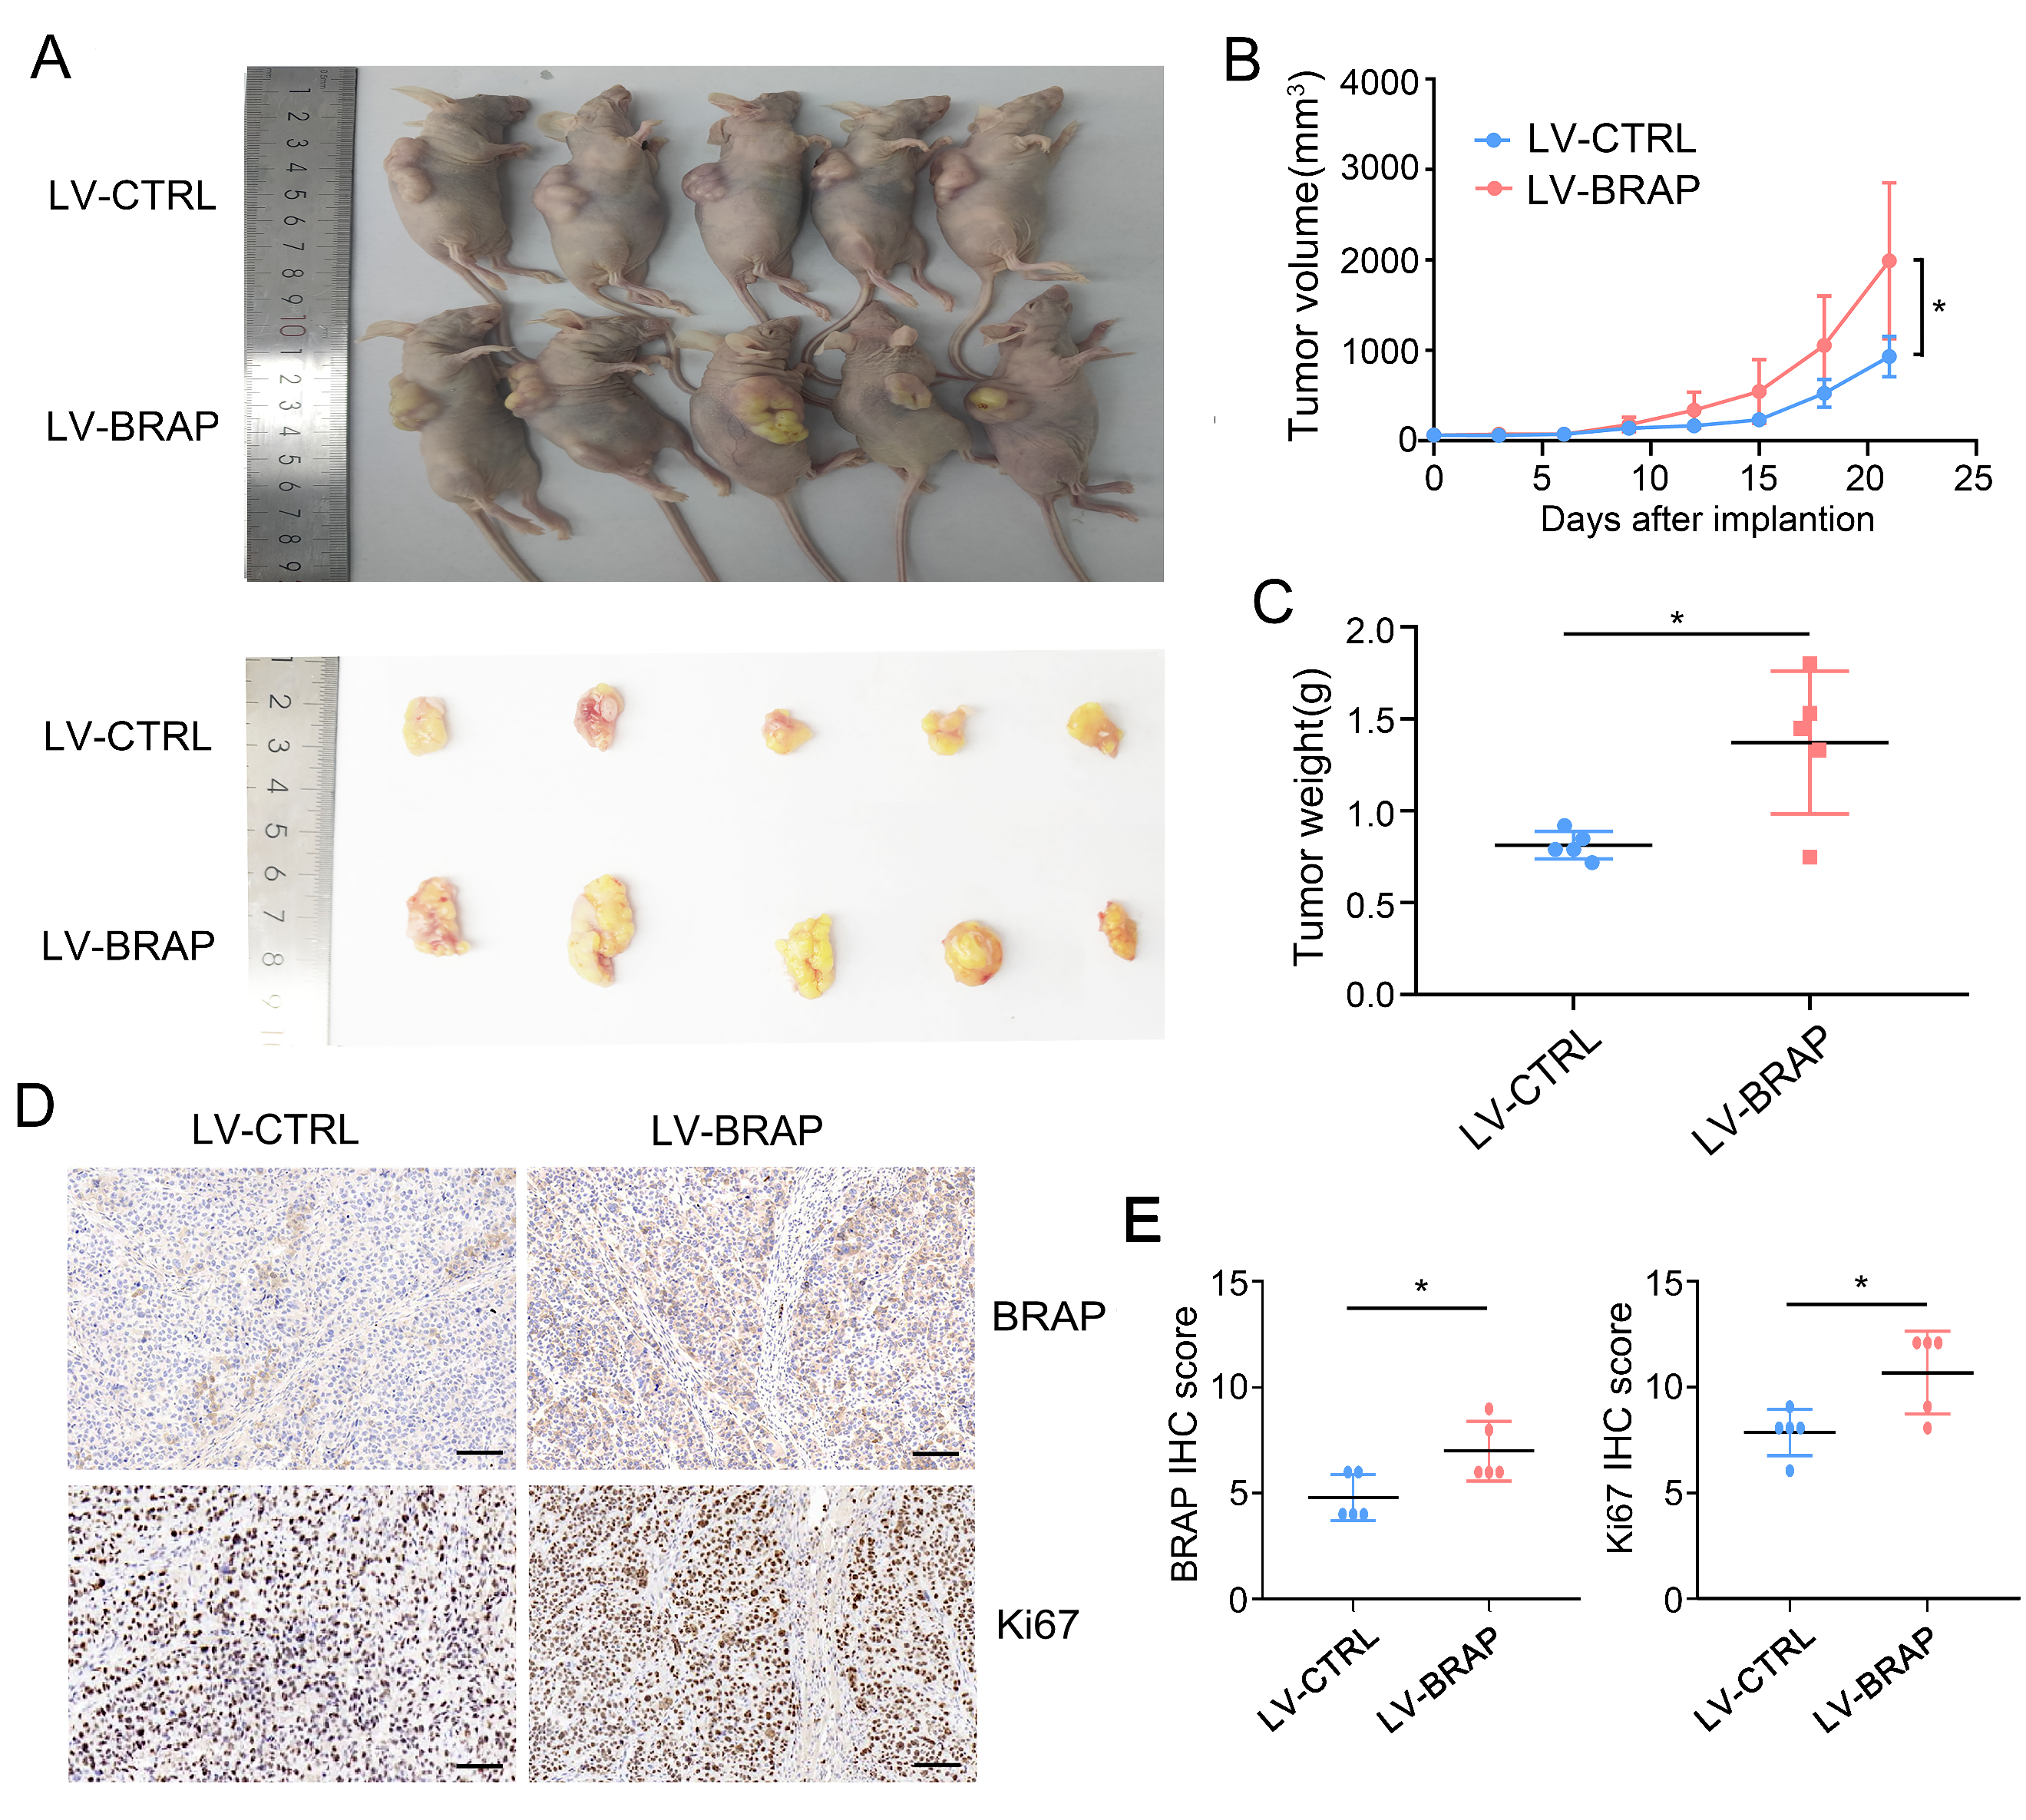
**

**Figure S2: BRAP promotes HCC tumor growth in vivo.** (A) A tumor model was established via subcutaneously injection of HepG2 cells stably expressing BRAP into nude mice and used to assess tumor growth. (B-C) The tumor growth curves and weights were compared between mouse xenografts derived from LV-BRAP or LV-CTRL HepG2 cells. (D-E) IHC staining LV-CTRL groups (scale bar=50 μm). **P* ≤ 0.05.

**
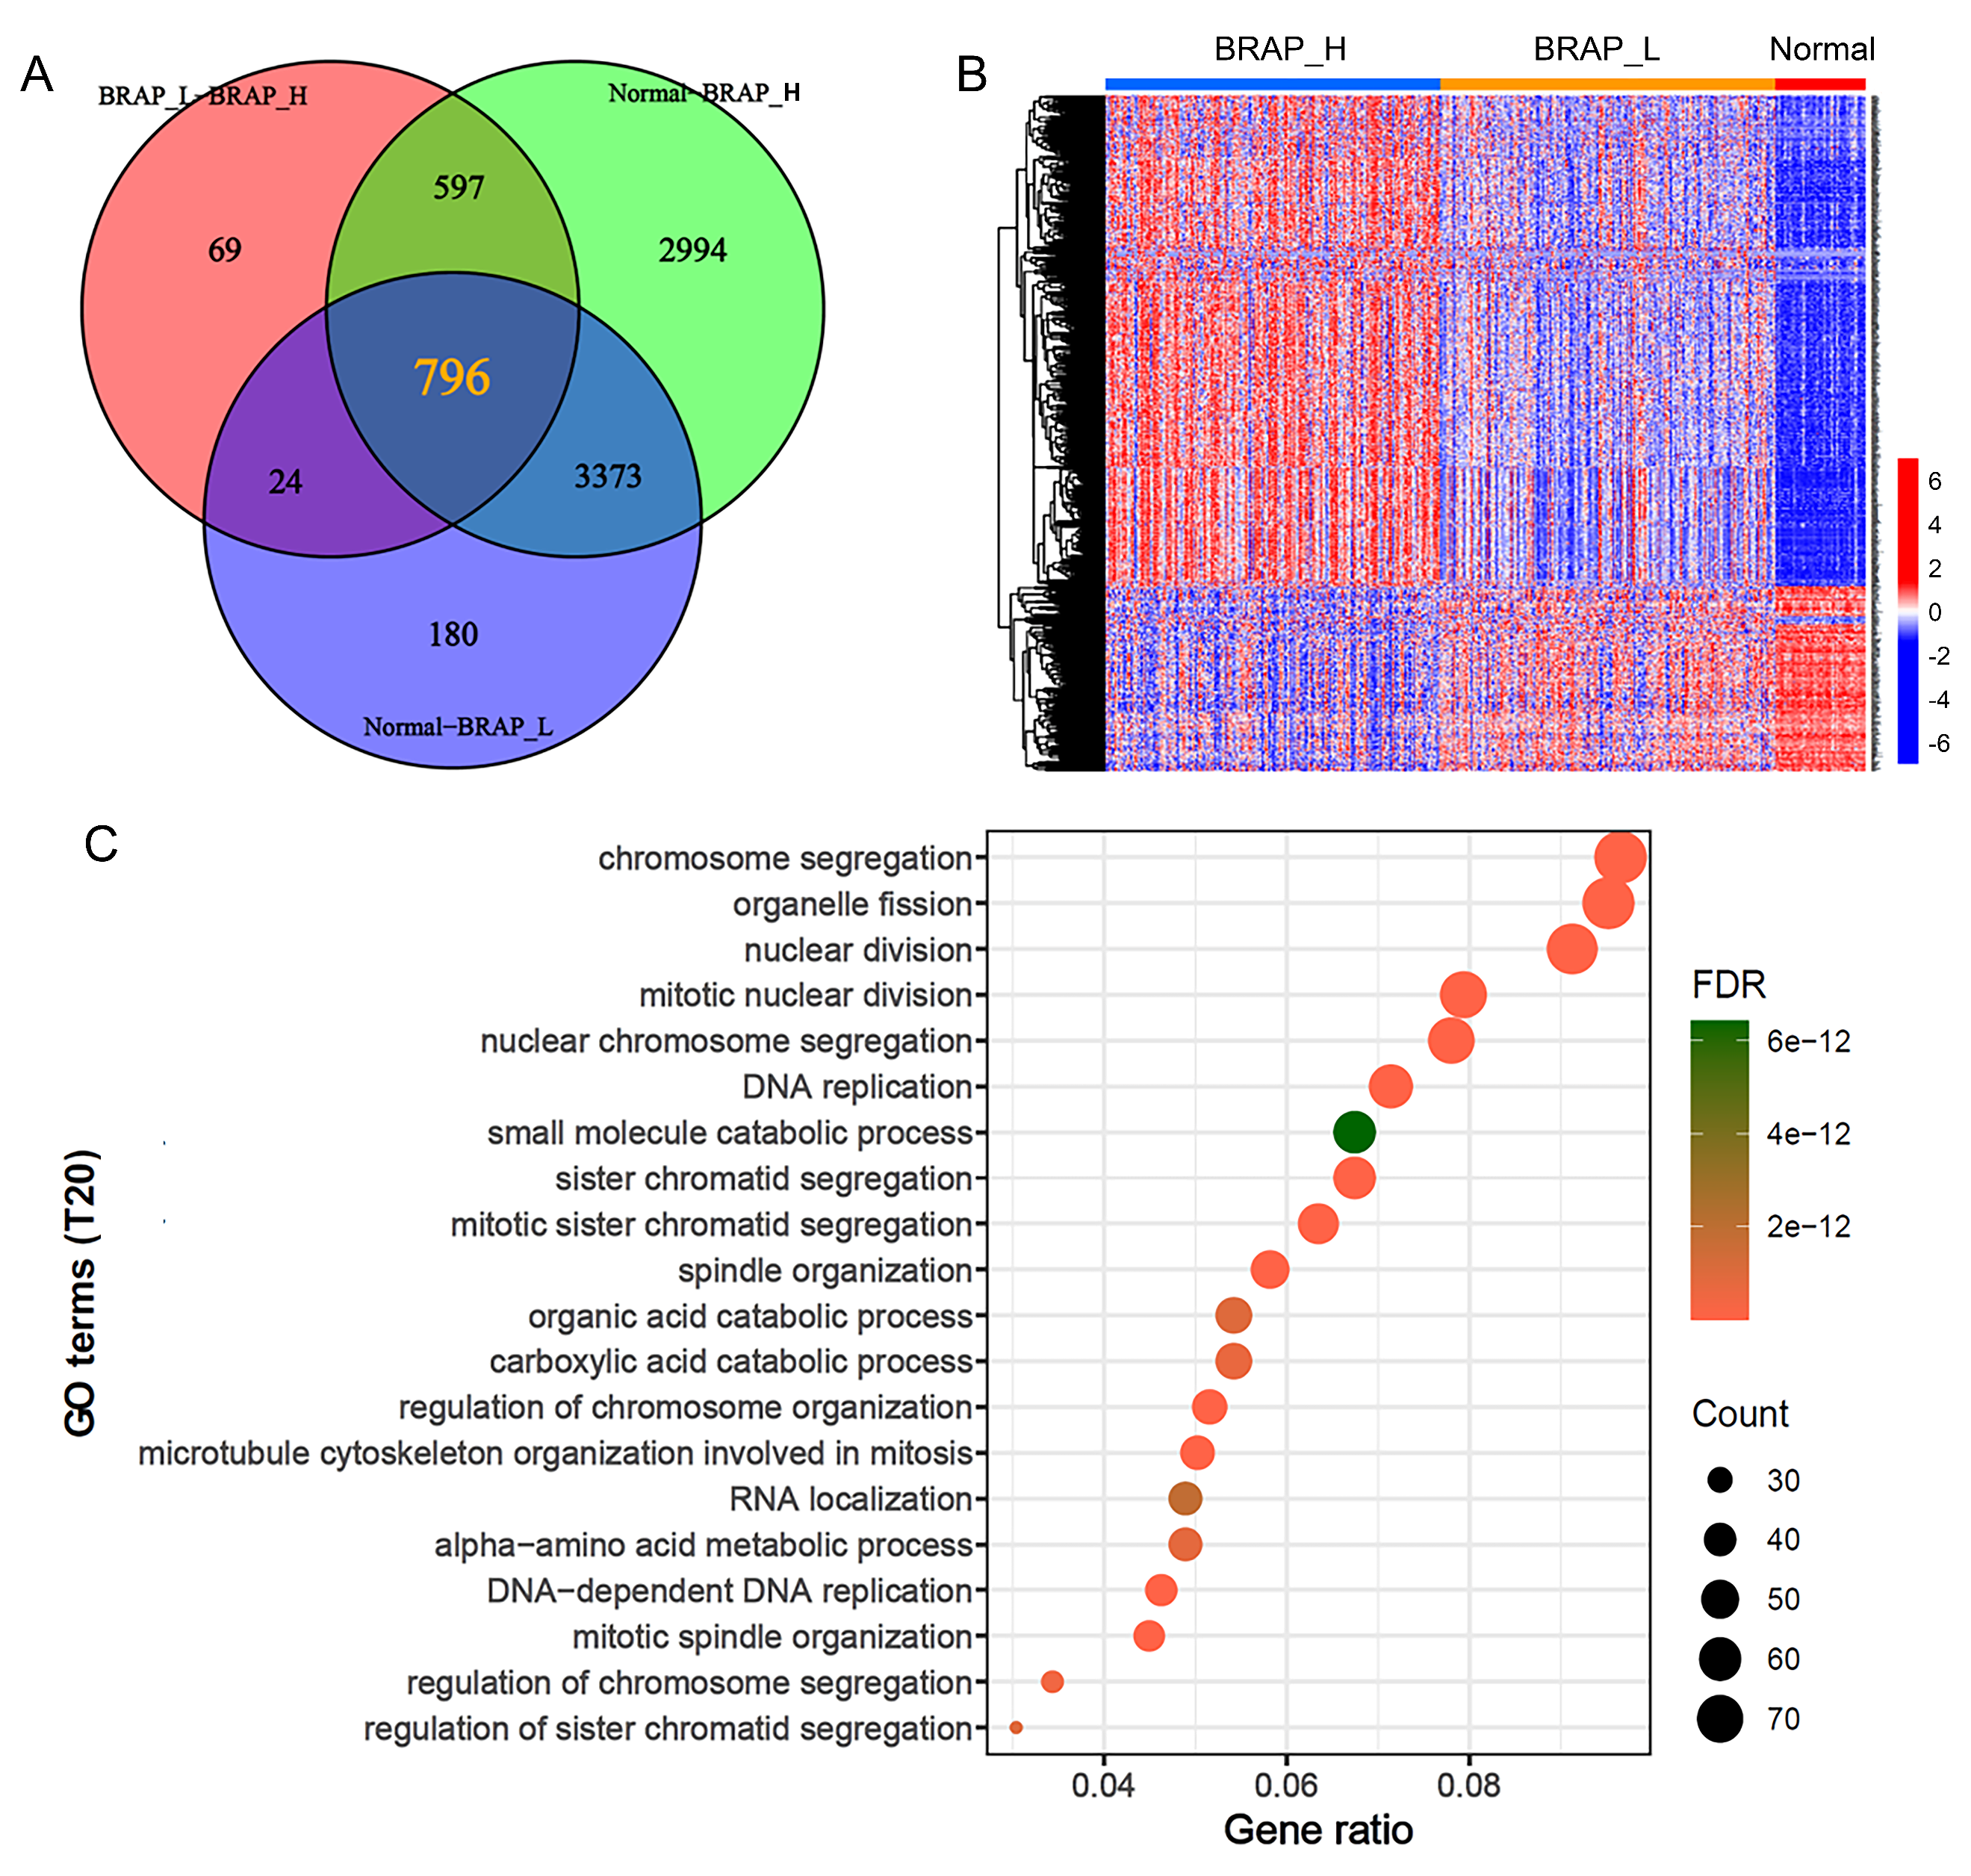
**

**Figure S3: Functional enrichment analysis of BRAP-related genes in HCC based on the TCGA dataset.** (A) Venn diagram illustrating the overlap of DEGs in normal liver tissues and HCC tissues exhibiting high versus low BRAP expression levels. (B) Heatmap depicting the DEGs in normal liver tissues compared with HCC tissues with high and low BRAP expression levels. (C) Bubble plot presenting the GO enrichment results for common DEGs.


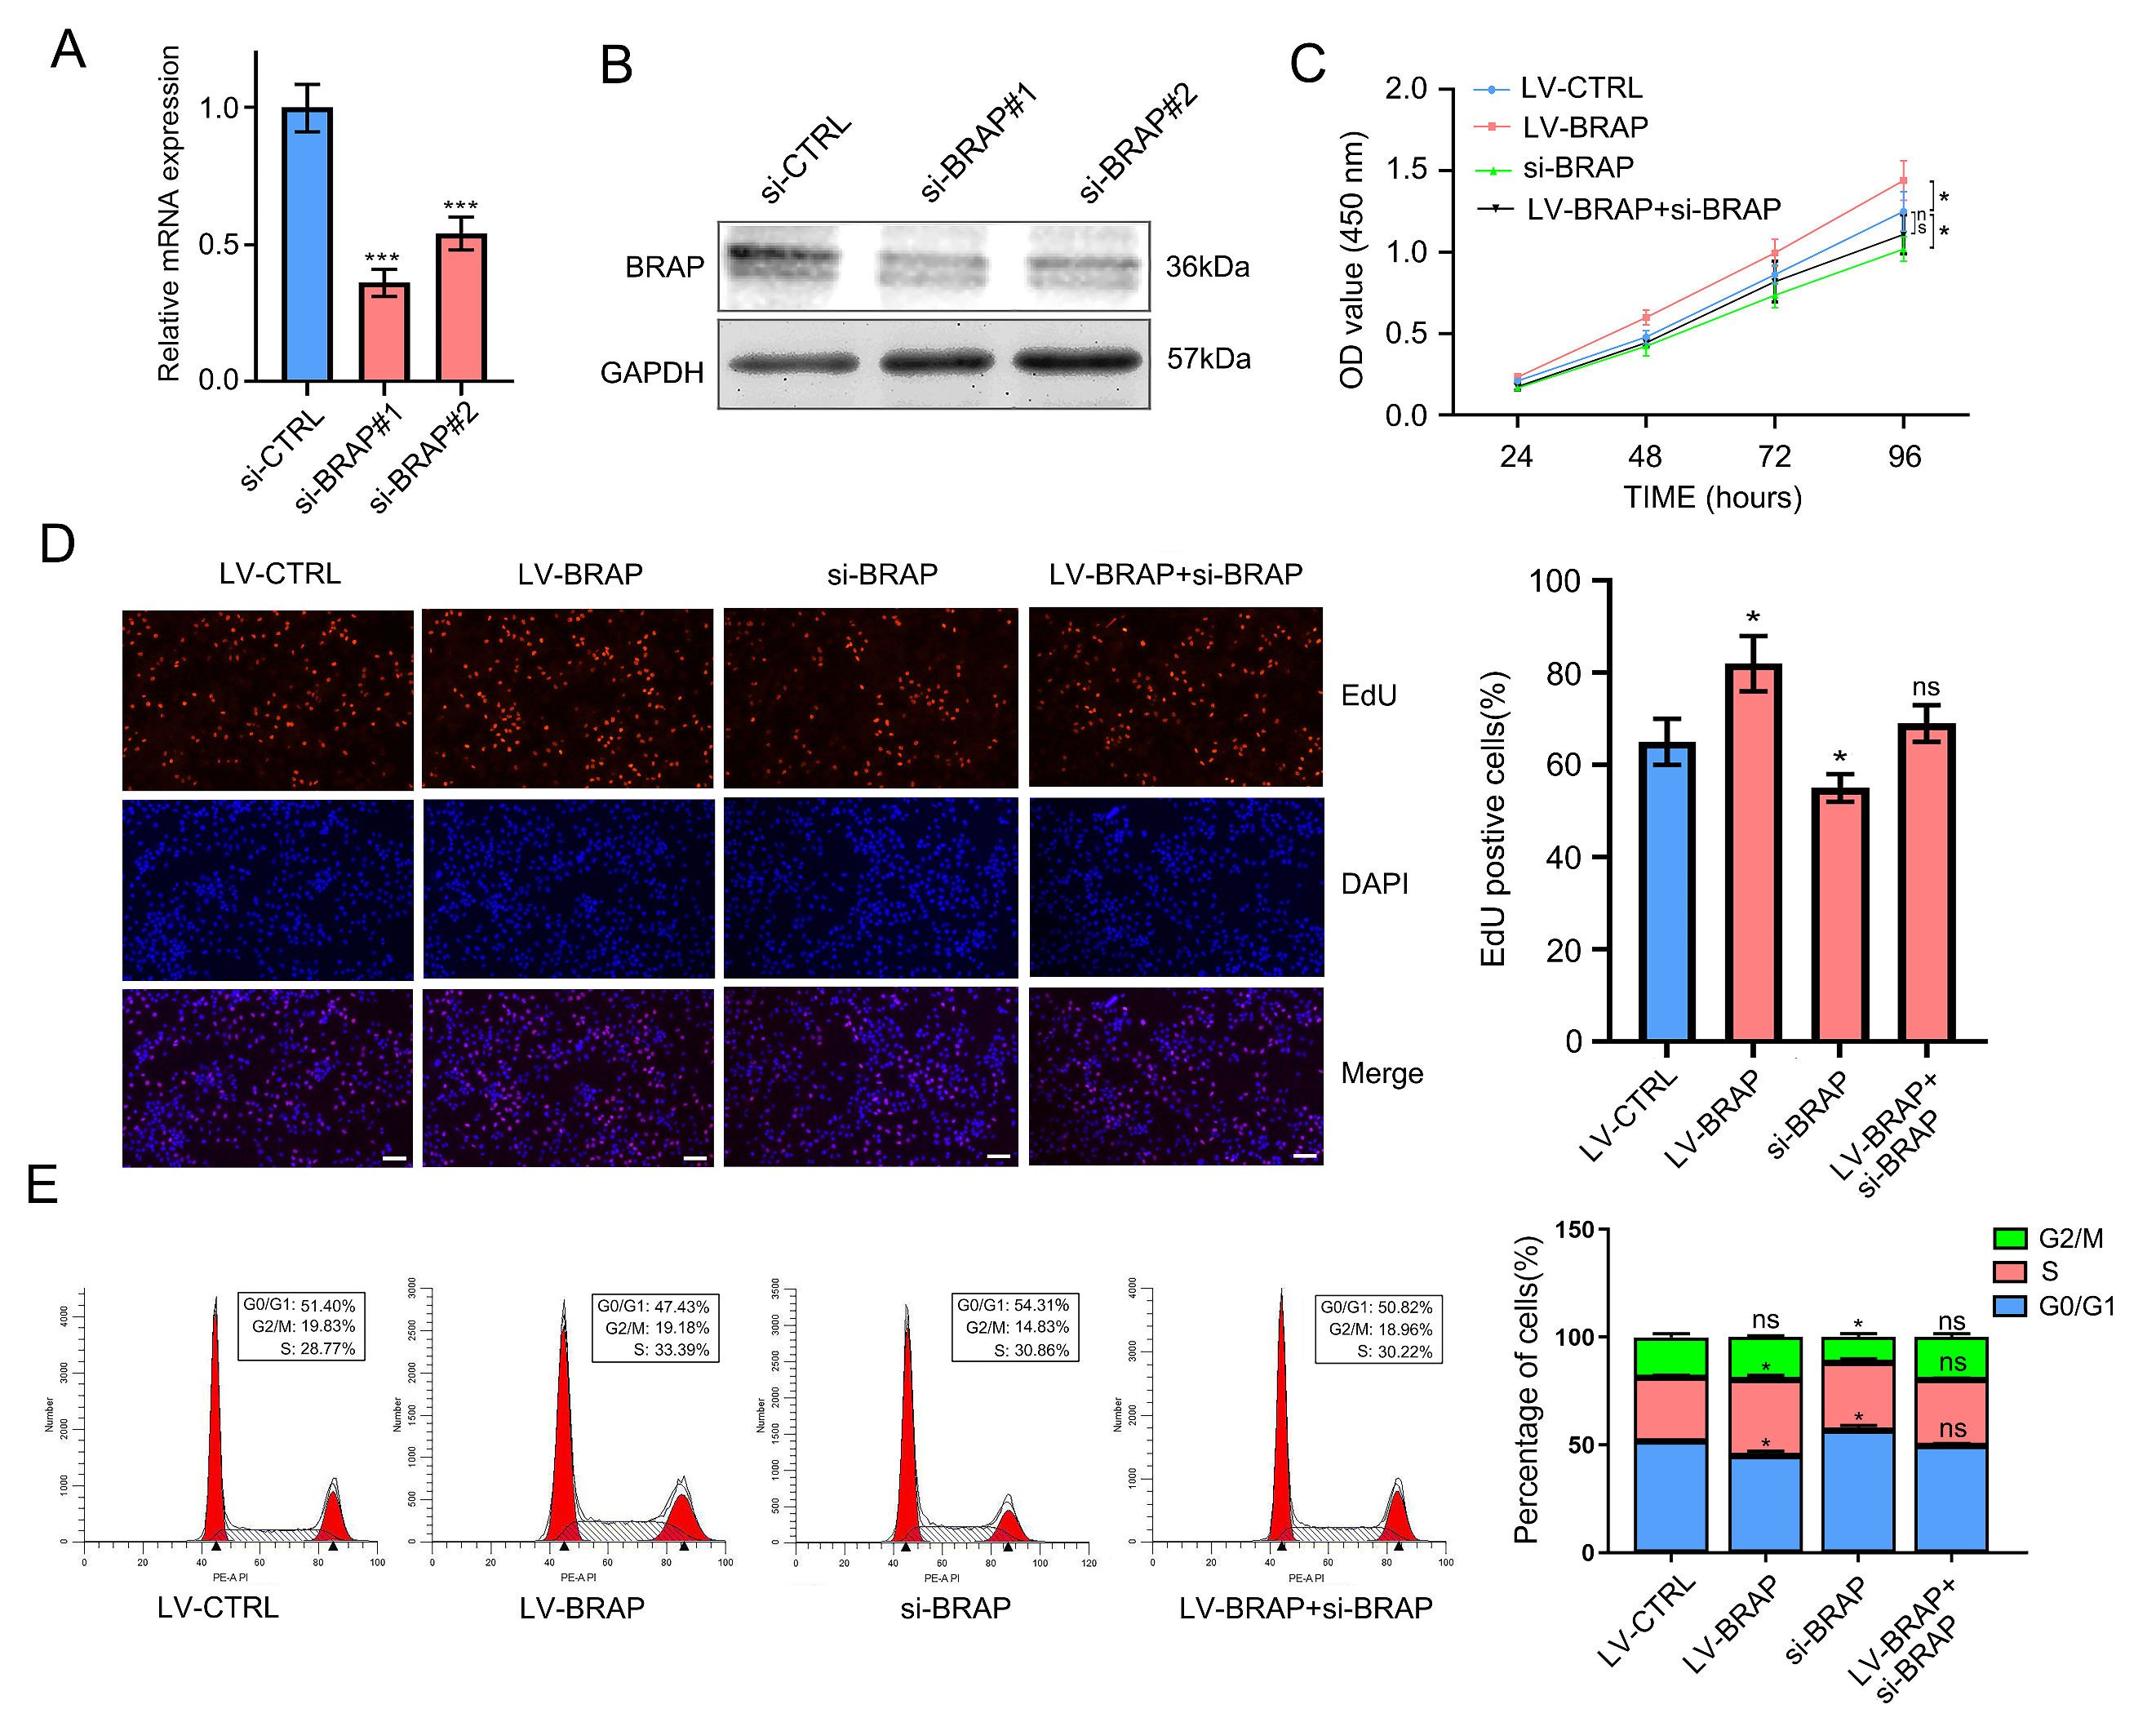


**Figure S4: Rescue experiments confirm that BRAP promotes malignant proliferation in HCC**. (A-B) qRT‒PCR and Western blotting verified BRAP knockdown efficiency in HepG2 cells transfected with si-BRAP or si-CTRL. (C) CCK-8 assay evaluated the viability of HepG2 cells. (D) EdU incorporation assay measured the proliferation of HepG2 cells. (E) Representative flow cytometry images (left) and quantitative analysis (right) of cell cycle phase distribution in HepG2 cells. ns: *P* > 0.05; **P* < 0.05; ***P* < 0.01; ****P* < 0.001.

**
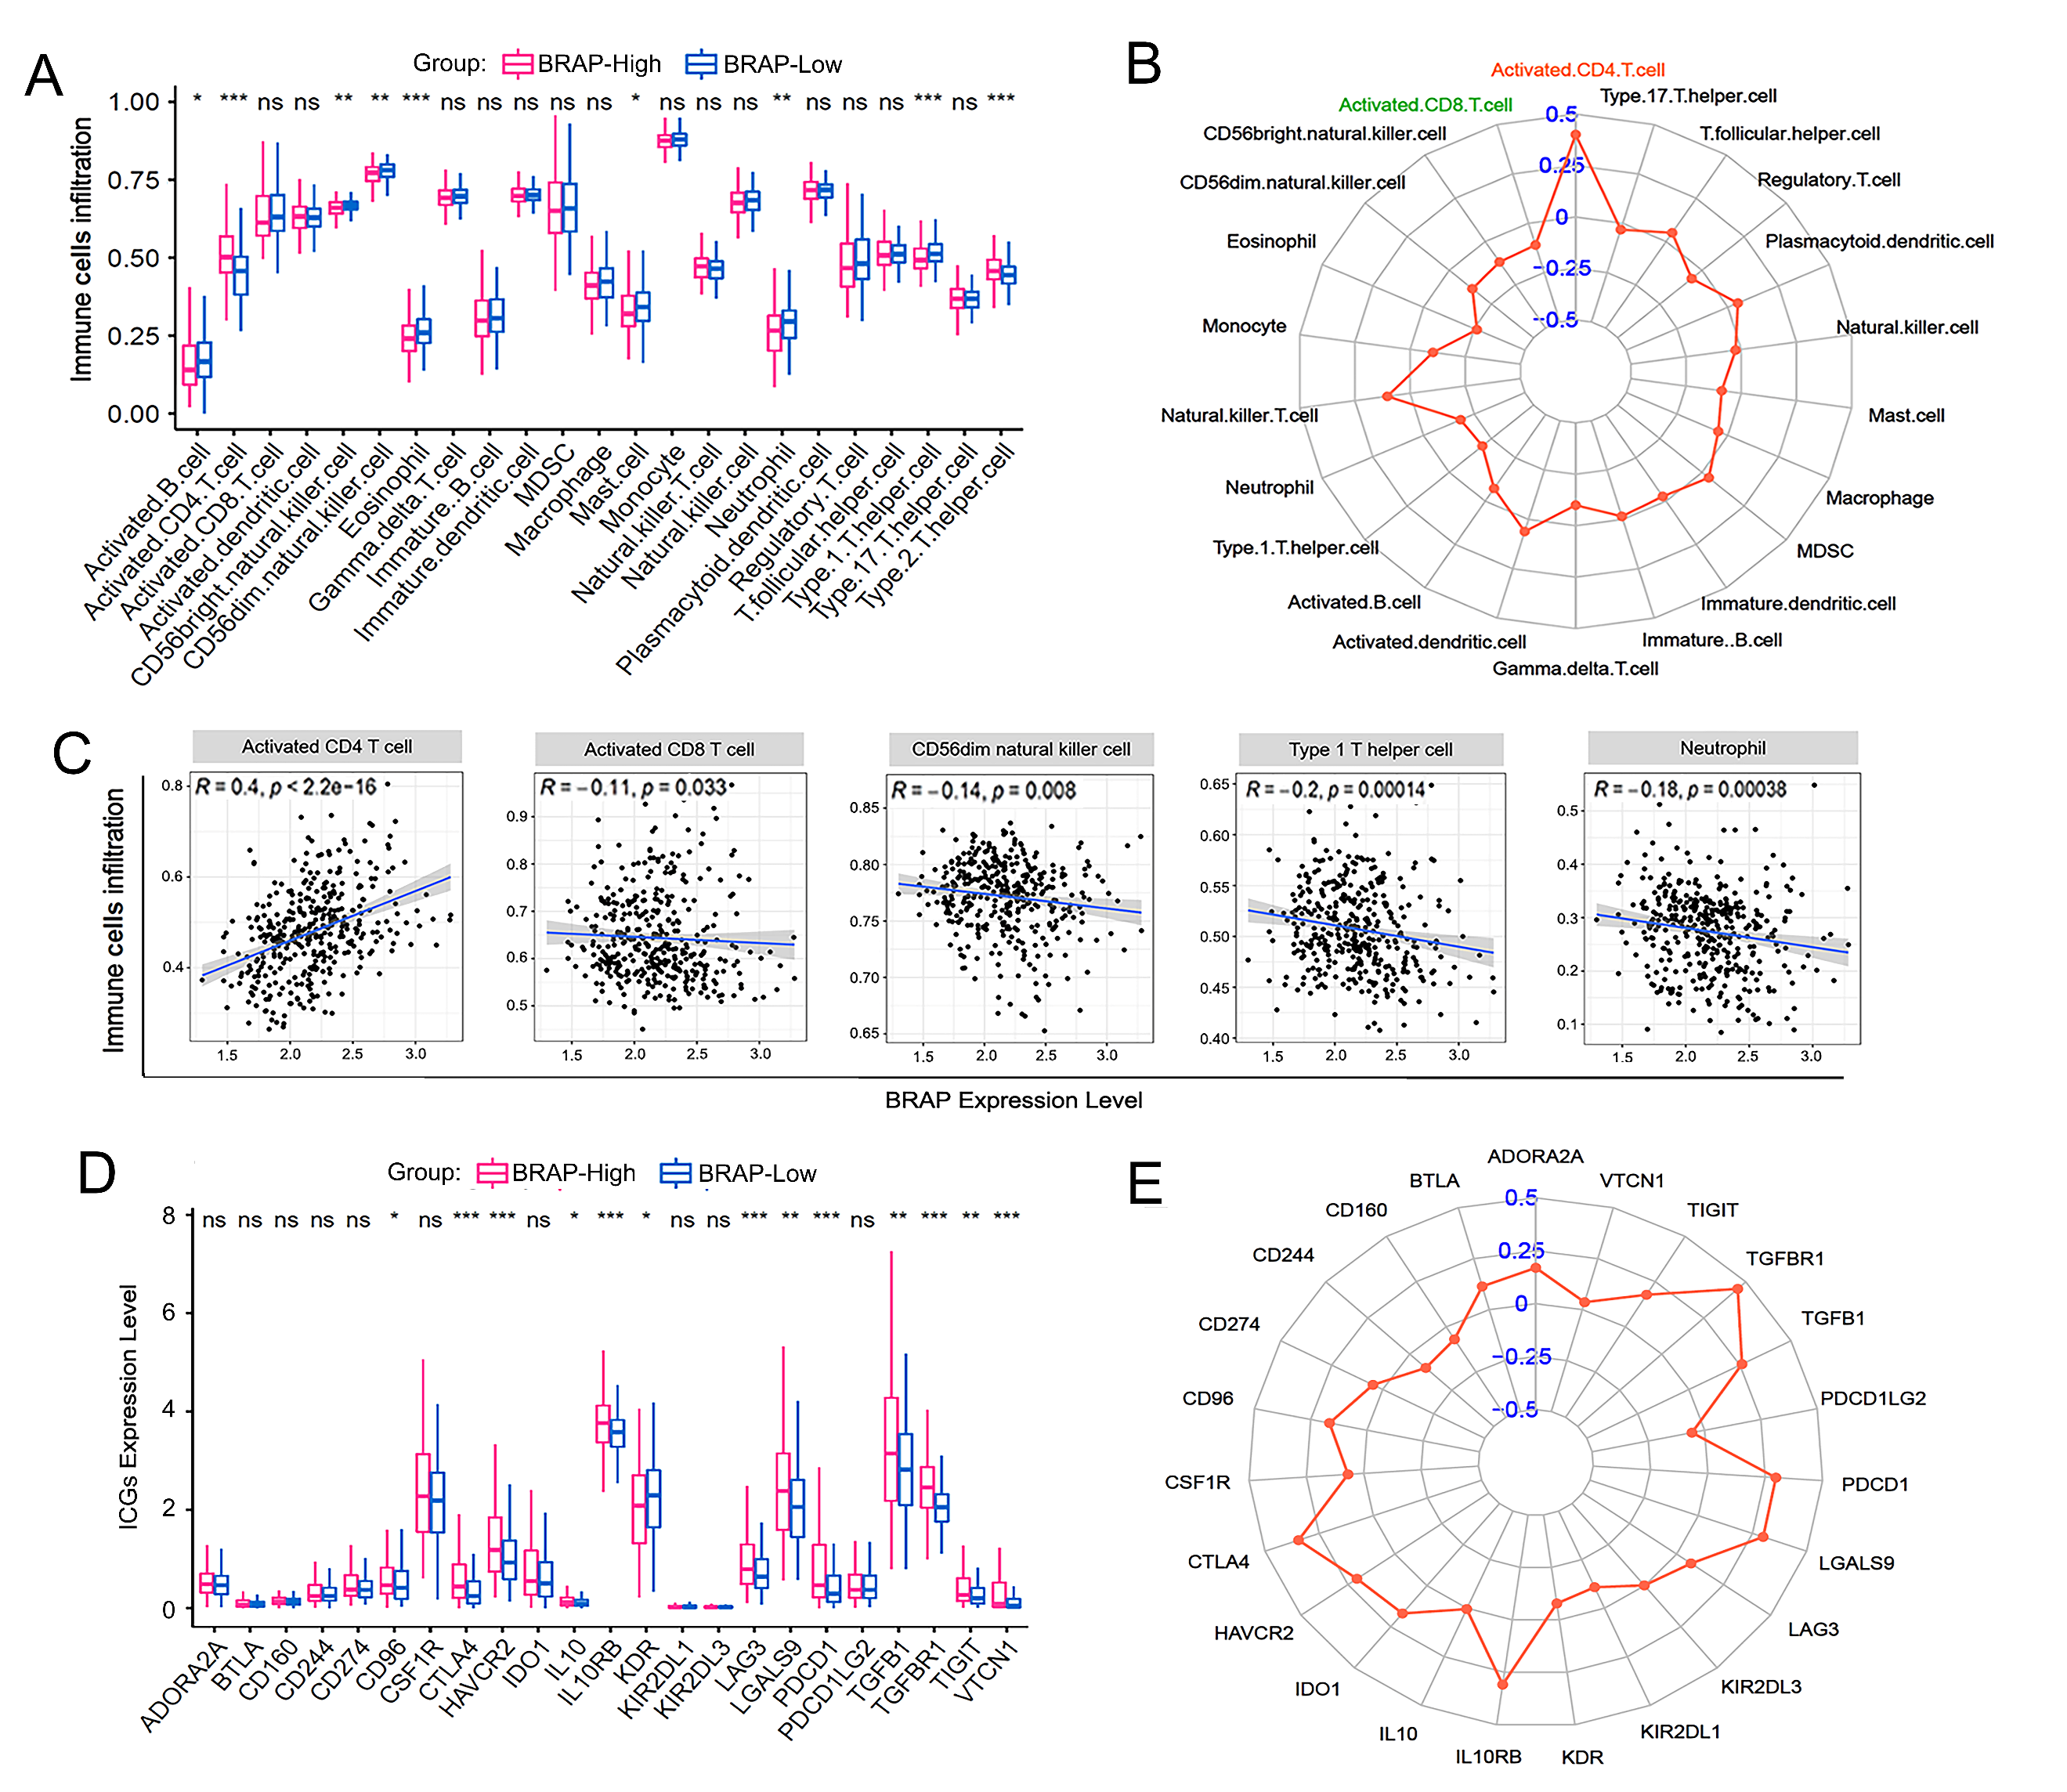
**

**Figure S5: Correlation between BRAP expression and features of the tumor immunosuppressive microenvironment in HCC.** (A) Proportions of different infiltrating immune cells in HCC tissues with high and low BRAP expression. (B) Radar chart illustrating the relationship between BRAP expression level and the level of immune cell infiltration in HCC. (C) Scatter plot depicting the correlation between BRAP expression level and immune cell infiltration level in HCC. (D) Levels of differential ICGs between HCC tissues with high and low BRAP expression levels. (E) Radar chart illustrating the relationship between BRAP expression level and the levels of immune checkpoint genes in HCC. ns: *P* > 0.05; **P* ≤ 0.05; ***P* < 0.01; ****P* < 0.001.

**
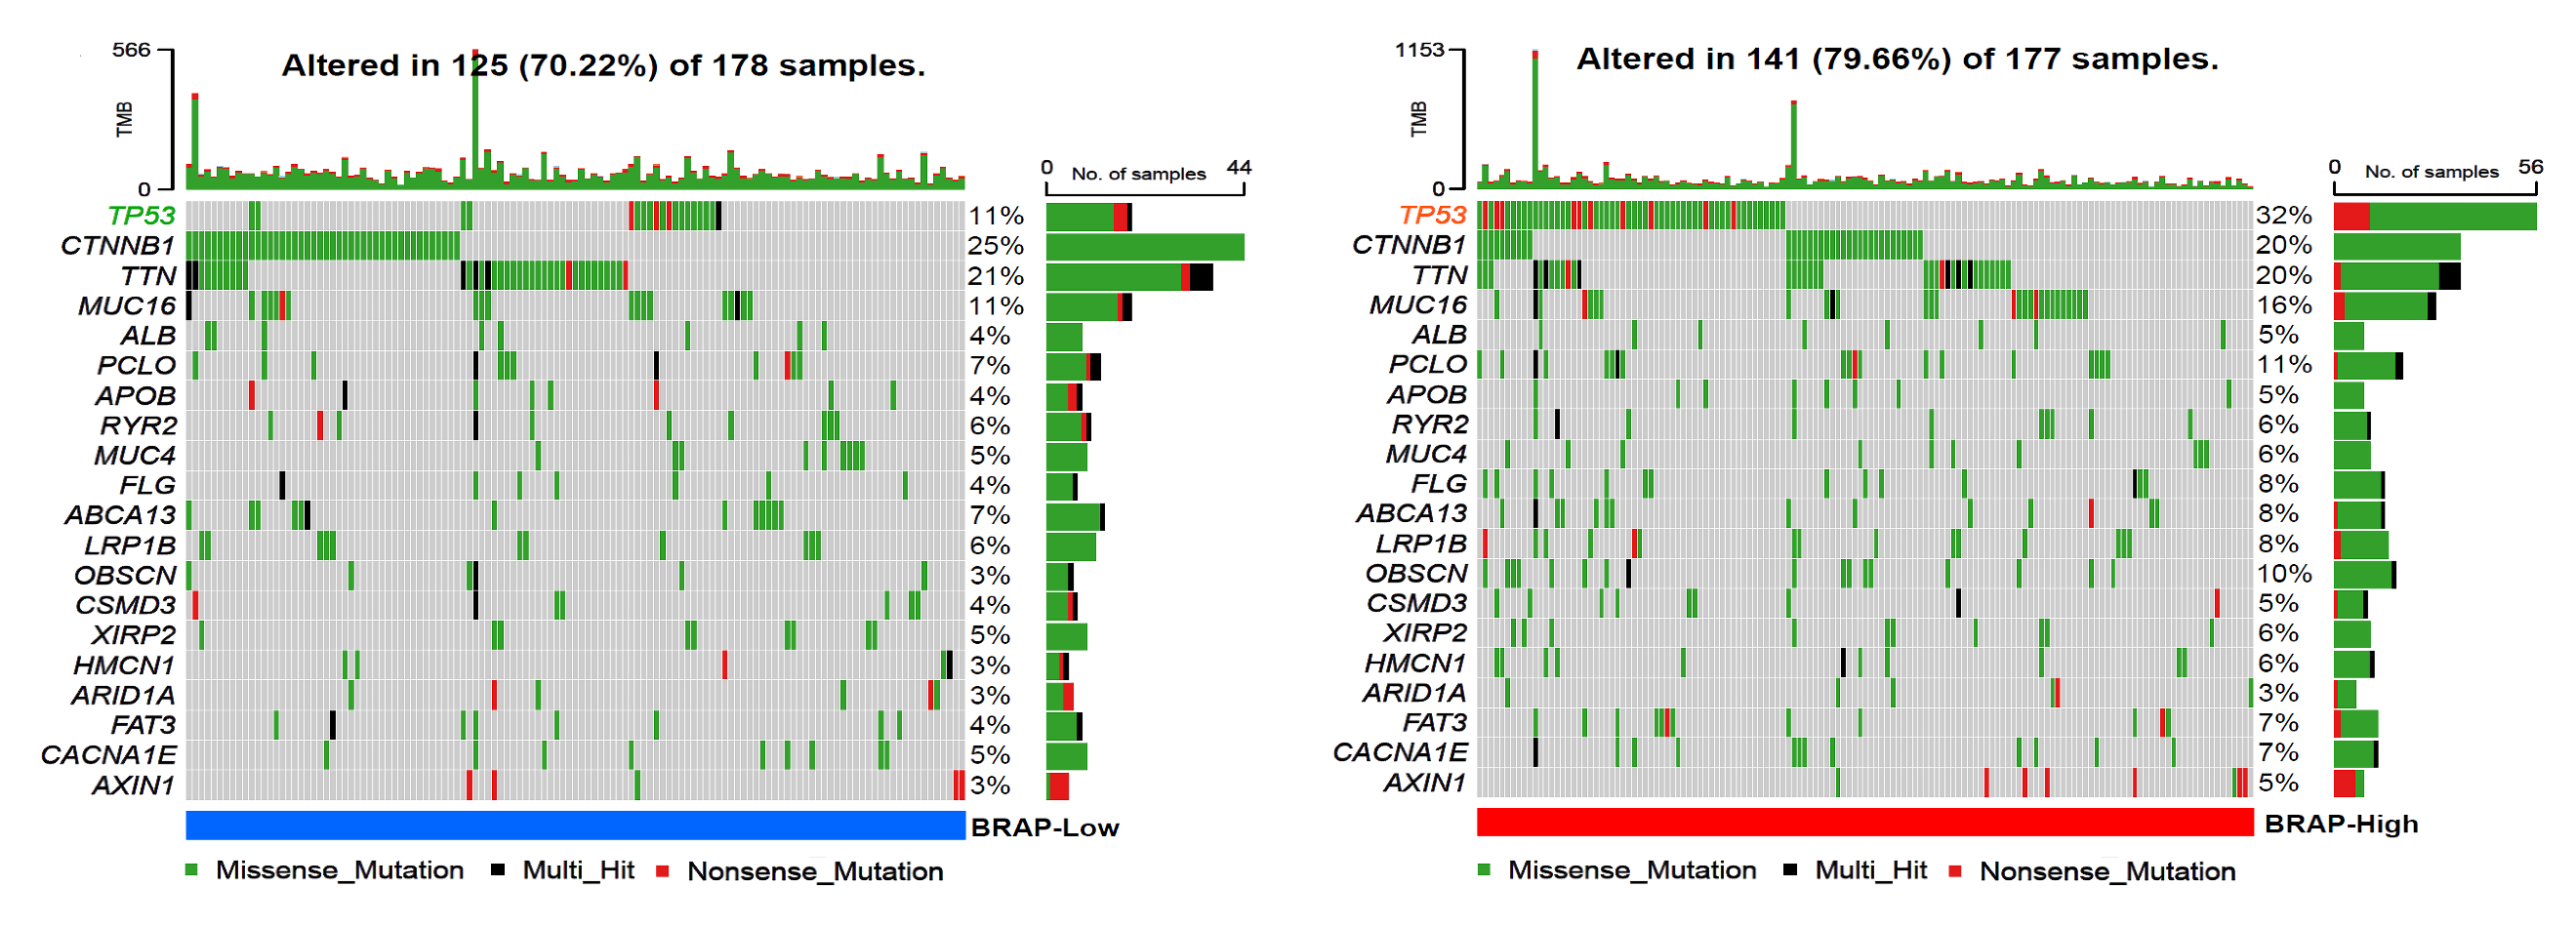
**

**Figure S6: Mutational differences were assessed between HCC tissues with high and low BRAP expression.**

**Table S1.** Antibody information.

| **Antibody** | **Cat number** | **Company** | **Dilution ratio** |
| --- | --- | --- | --- |
| anti-BRAP | Cat: GTX16484  Cat:ab237505 | GeneTex(WB)  Abcam(IHC) | 1:500(WB)  1:300(IHC) |
| anti-CDK1 | Cat:ab133327 | Abcam | 1:10000 |
| anti-CDK4 | Cat:2546 | Cell Signaling Technology | 1:1000 |
| anti-CyclinB1 | Cat:12231 | Cell Signaling Technology | 1:1000 |
| anti-CyclinD1 | Cat:2978 | Cell Signaling Technology | 1:1000 |
| anti-p21 | Cat:10373-2-AP | Proteintech | 1:600 |
| anti-RAF1 | Cat:66592-1-Ig | Proteintech | 1:3000 |
| anti-phospho-RAF1 (Ser43) | Cat:bs-5648R | Bioss | 1:1000 |
| anti-ERK1/2 | Cat:11257-1-AP | Proteintech | 1:3000 |
| anti-Phospho-ERK1/ (Thr202/Tyr204) | Cat:28733-1-AP | Proteintech | 1:2000 |
| anti-MEK1 | Cat:51080-1-AP | Proteintech | 1:1000 |
| anti-Phospho-MEK1 (Thr292) | Cat:28930-1-AP | Proteintech | 1:2000 |
| anti-Ki67 | Cat:12202 | Cell Signaling Technology | 1:400(IHC) |
| anti-CD4 | Cat:ZM0418 | ZSGB Biotech | 1:200 |
| anti-CD8 | Cat:70306 | Cell Signaling Technology | 1:400 |
| anti-CD163 | Cat:93498 | Cell Signaling Technology | 1:500 |
| anti-FOXP3 | Cat:BLG320202 | Biolegend | 1:80 |
| anti-PD1 | Cat:86163 | Cell Signaling Technology | 1:200 |
| anti-GAPDH | Cat:10494-1-AP | Proteintech | 1:10000 |
| anti-β-actin | Cat:66009-1-Ig | Proteintech | 1:20000 |

**Table S2.** qRT-PCR primers.

| **Gene Name** | **Direction** | **Sequence** |
| --- | --- | --- |
| BRAP | Forward  Reverse | 5’-TGTCACTGGTTGTTATCCGATTG-3’  5’-GCTGAGGCTAGTGTCGTCTTT-3’ |
| CD274 | Forward  Reverse | 5’-TGGCATTTGCTGAACGCATTT-3’  5’-TGCAGCCAGGTCTAATTGTTTT-3’ |
| IDO1 | Forward  Reverse | 5’-GCCAGCTTCGAGAAAGAGTTG-3’  5’-ATCCCAGAACTAGACGTGCAA-3’ |
| IL1A | Forward  Reverse | 5’-TGGTAGTAGCAACCAACGGGA-3’  5’-ACTTTGATTGAGGGCGTCATTC-3’ |
| HLA-B | Forward  Reverse | 5’CAGTTCGTGAGGTTCGACAG-3’  5’-CAGCCGTACATGCTCTGGA-3’ |
| MICB | Forward  Reverse | 5’-TCTTCGTTACAACCTCATGGTG-3’  5’-TCCCAGGTCTTAGCTCCCAG-3’ |
| GAPDH | Forward  Reverse | 5’-GTCTCCTCTGACTTCAACAGCG-3’  5’-ACCACCCTGTTGCTGTAGCCAA-3’ |

**Table S3.** Sequence of shRNA utilized in this study.

| **Gene Name** | **Sequence (5’ to 3’)** |
| --- | --- |
| sh-BRAP-#1 | 5’-GGGACTATGCTGGAGATAACT-3’ |
| sh-BRAP-#2 | 5’-GCTCAAAGAGGAGCAGGAAAT-3’ |

**Table S4.** Multivariate cox analysis of BRAP expression and clinicpathological variables.

| **Characteristics** | **Total(N)** | **HR(95%CI)** | ***P* value** |
| --- | --- | --- | --- |
| Age | 97 |  |  |
| ≤60 | 70 | Reference |  |
| >60 | 27 | 2.329(1.451-3.738) | <0.001 |
| Gender | 97 |  |  |
| Male | 84 | Reference |  |
| Female | 13 | 1.127(0.610-2.081) | 0.703 |
| Pathology grade | 97 |  |  |
| G1 | 4 | Reference |  |
| G2 | 46 | 0.695(0.213-2.269) | 0.547 |
| G3 | 47 | 1.750(0.541-5.660) | 0.35 |
| HBsAg | 97 |  |  |
| Yes | 64 | Reference |  |
| No | 33 | 1.173(0.742-1.855) | 0.496 |
| AFP(ug/L) | 97 |  |  |
| ≤400 | 73 | Reference |  |
| >400 | 24 | 1.197(0.729-1.966) | 0.478 |
| Tumor size(cm) | 97 |  |  |
| ≤5 | 43 | Reference |  |
| >5 | 54 | 1.025(0.661-1.589) | 0.912 |
| Liver cirrhosis | 97 |  |  |
| Yes | 62 | Reference |  |
| No | 35 | 1.074(0.685-1.685) | 0.755 |
| TNM stage | 97 |  |  |
| Stage Ⅰ | 17 | Reference |  |
| Stage Ⅱ | 19 | 1.605(0.758-3.402) | 0.217 |
| Stage Ⅲ | 58 | 1.638(0.871-3.079) | 0.126 |
| Stage Ⅳ | 3 | 24.412(5.942-100.292) | <0.001 |
| PVTT | 97 |  |  |
| Yes | 14 | Reference |  |
| No | 83 | 0.393(0.219-0.706) | 0.002 |
| Group | 97 |  |  |
| BRAP-Low | 46 | Reference |  |
| BRAP-High | 51 | 1.954(1.249-3.058) | 0.003 |

**Table S5.** Clinicopathological features of patients and correlation with BRAP mRNA expression in TCGA-LIHC data.

| **Characteristics n(%)** | | **Total n= 371** | **BRAP-High n=186** | **BRAP-Low n=185** | ***P* value** |
| --- | --- | --- | --- | --- | --- |
| **Age** | |  |  |  | 0.712 |
| ≤60 | | 169 (45.6) | 87 (46.8) | 82 (44.3) |  |
| ＞60 | | 202 (54.4) | 99 (53.2) | 103 (55.7) |  |
| **Gender** | |  |  |  | 0.971 |
| Male | | 250 (67.4) | 126 (67.7) | 124 (67.0) |  |
| Female | | 121 (32.6) | 60 (32.3) | 61 (33.0) |  |
| **OS status** | |  |  |  | 0.025 |
| Alive | | 241 (65.0) | 110 (59.1) | 131 (70.8) |  |
| Death | | 130 (35.0) | 76 (40.9) | 54 (29.2) |  |
| **Pathology grade** | |  |  |  | <0.001 |
| G1 | | 55 (15.0) | 16 (8.7) | 39 (21.3) |  |
| G2 | 177 (48.4) | | 74 (40.4) | 103 (56.3) |  |
| G3 | 122 (33.3) | | 82 (44.8) | 40 (21.9) |  |
| G4 | 12 (3.3) | | 11 (6.0) | 1 (0.5) |  |
| **TNM stage** | |  |  |  | 0.121 |
| Stage Ⅰ | | 171 (49.3) | 79 (45.9) | 92 (52.6) |  |
| Stage Ⅱ | | 86 (24.8) | 40 (23.3) | 46 (26.3) |  |
| Stage Ⅲ/Ⅳ | | 90 (25.9) | 53 (30.8) | 37(21.1) |  |
| **Vascular invasion** | |  |  |  | 0.106 |
| Macro | | 16 (5.1) | 10 (6.5) | 6 (3.7) |  |
| Micro | | 93 (29.5) | 52 (33.8) | 41 (25.5) |  |
| None | | 206 (65.4) | 92 (59.7) | 114 (70.8) |  |
